# Supplementary material for: Transcription factor HNF4α2 promotes osteogenesis and prevents bone abnormalities in mice with renal osteodystrophy
Source: PubMed Central journal article supplement (PMC10231994; doi:10.1172/jci159928), 2023-06-01
Supplement: jci-133-159928-s134.pdf [file jci-133-159928-s134.pdf]

## Supplementary figures

Fig. S1

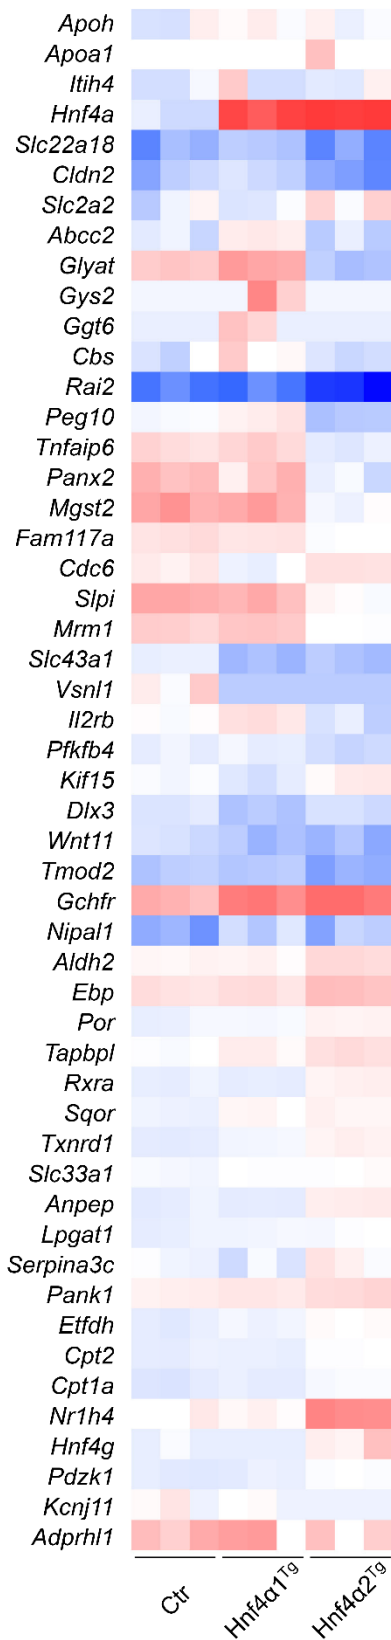

**Fig. S1: HNF4α overexpression alters the expression of known HNF4α targets in osteoblasts.** Heatmap-represented log-normalized expression of genes identified in Ctr, Hnf4α1<sup>Tg</sup>, and Hnf4α2<sup>Tg</sup> cultured MC3T3-E1 osteoblasts. Statistical tests were performed using an ANOVA test, followed by unpaired student's t test and corrected by the False Discovery Rate.

Fig. S2

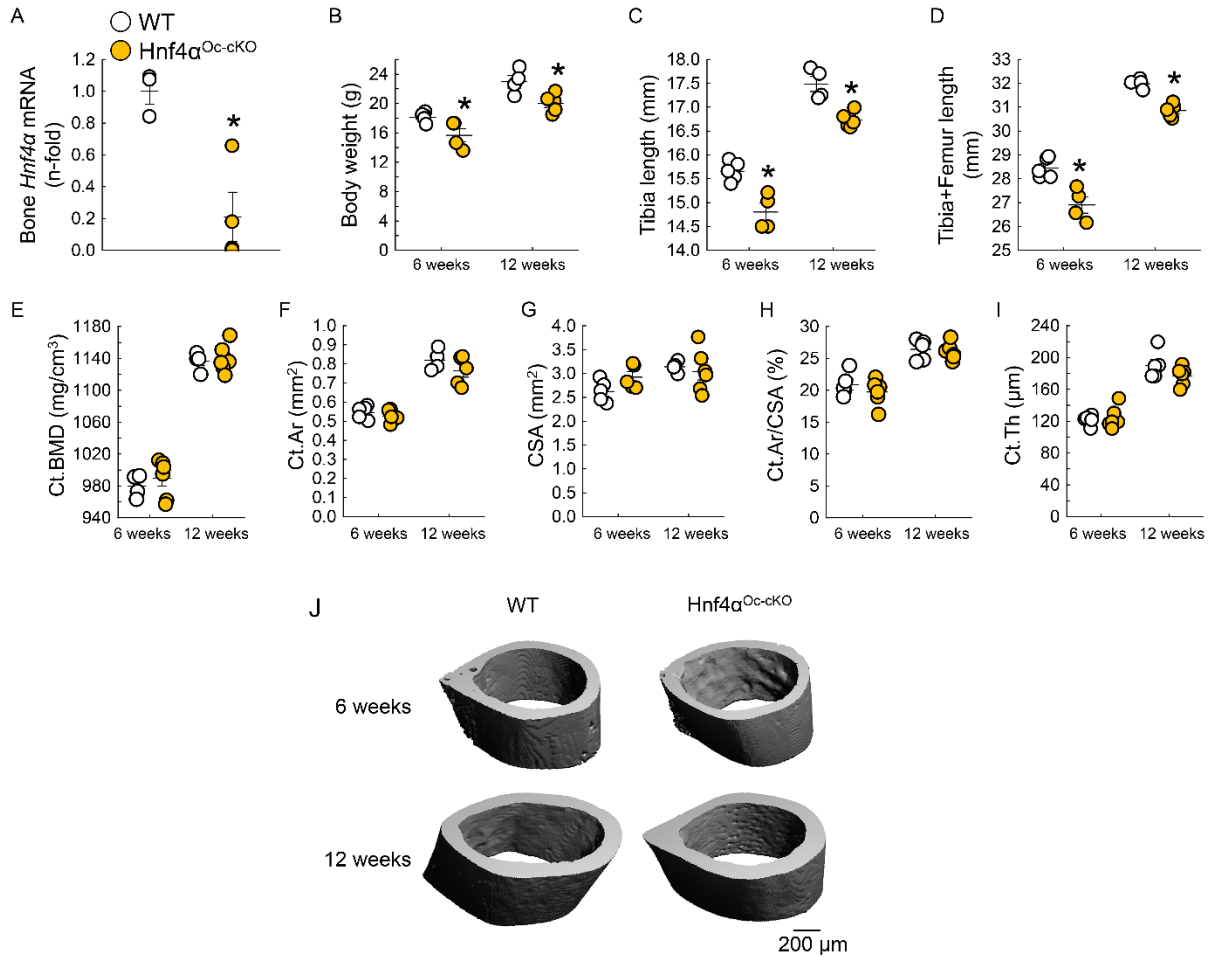

**Fig. S2: Osteoblast-specific *Hnf4a* deletion leads to impaired bone growth.** (A) Bone *Hnf4α* mRNA expression in femoral bone of adult (12 weeks) WT (n=3) and *Hnf4α*<sup>Oc-cKO</sup> (n=4) male mice, (B) body weight, (C-D) tibia and femur lengths, and (E-J) 3D microtomography of femur cortical bone analyzed at midshaft in young (6 weeks) and adult (12 weeks) WT and *Hnf4α*<sup>Oc-cKO</sup> male mice. Values are expressed as mean±SE. n≥5, p<0.05 vs. \*age-matched WT. Statistical tests were performed using unpaired student's t tests.

Fig. S3

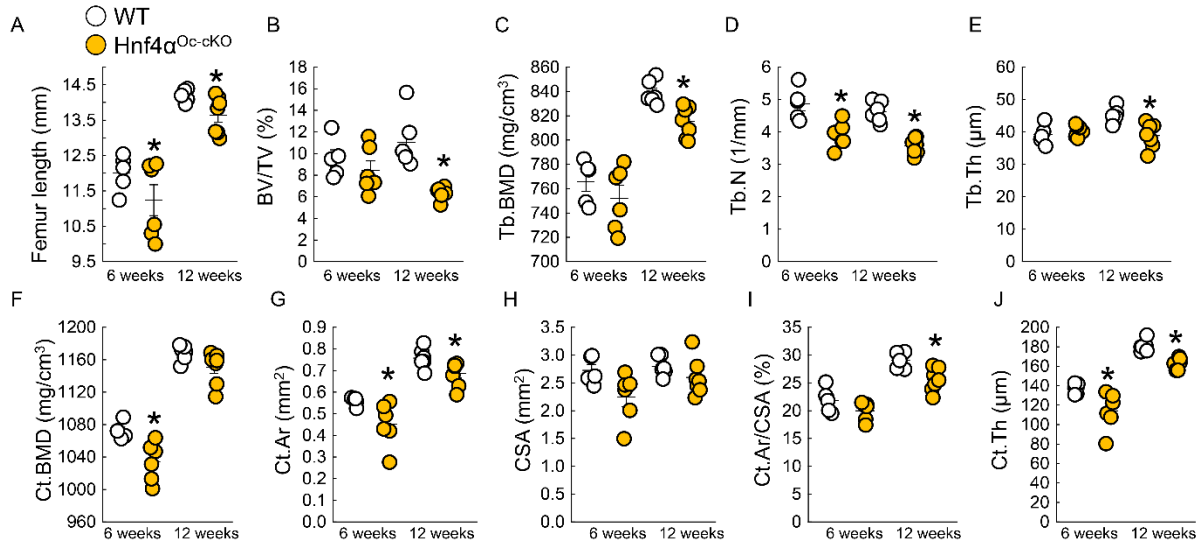

**Fig. S3: Osteoblast-specific *Hnf4α* deletion leads to trabecular bone loss in female mice.** (A) Femur length and (B-J) 3D microtomography of femur trabecular (B-E) and cortical (F-J) bone analyzed at midshaft in young (6 weeks) and adult (12 weeks) WT and *Hnf4α*<sup>Oc-cKO</sup> female mice. Values are expressed as mean±SE. n≥4 per group. p<0.05 vs. \*age-matched WT. Statistical tests were performed using unpaired student's t tests.

Fig. S4

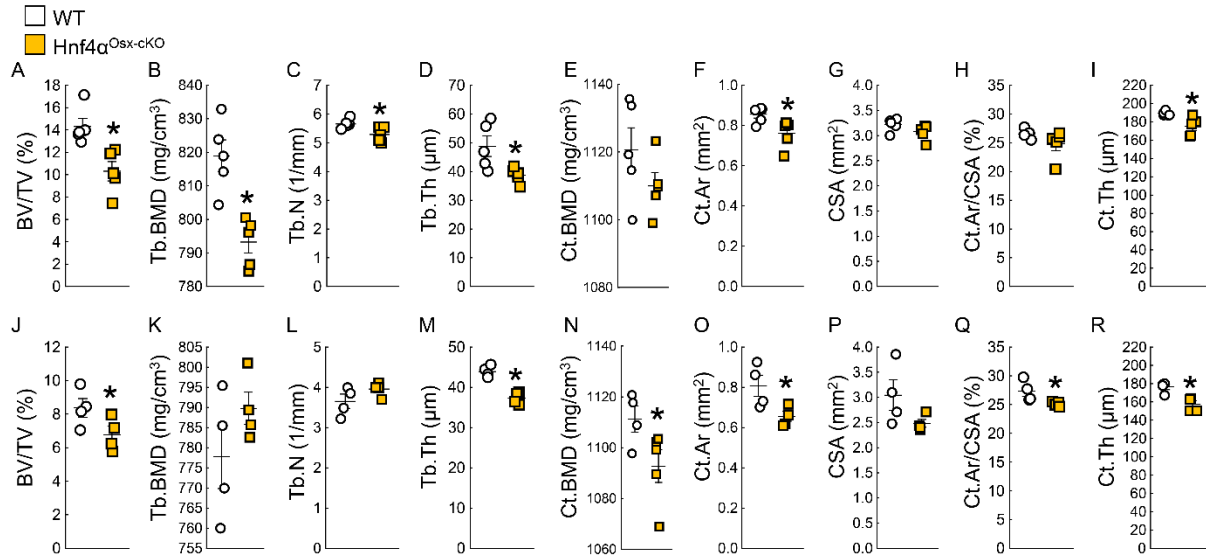

**Fig. S4: Pre-osteoblast-specific *Hnf4α* deletion leads to trabecular and cortical bone loss in male and female mice.** (A-R) 3D microtomography of femur trabecular (A-D and J-M) and cortical (E-I and N-R) bone analyzed at midshaft in adult (12 weeks) WT and *Hnf4α*<sup>Ox-cKO</sup> male (A-I) and female (J-R) mice. Values are expressed as mean±SE. n≥4 per group. p<0.05 vs. \*sex and age-matched WT. Statistical tests were performed using unpaired student's t tests.

Fig. S5

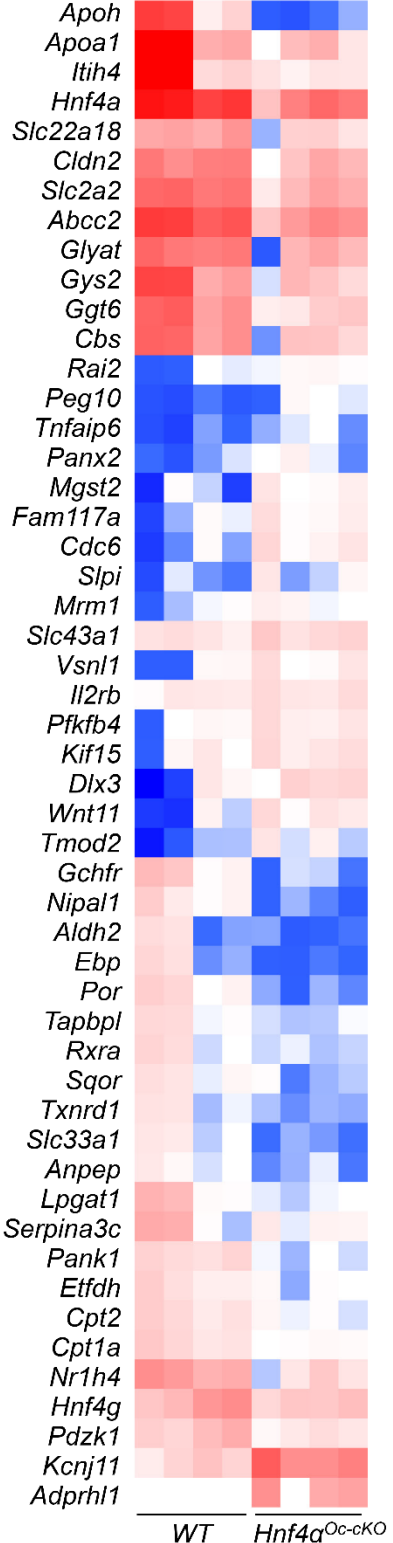

**Fig. S5: Osteoblast-specific deletion of *Hnf4a* alters the expression of known HNF4α targets in bone.** Heatmap-represented of log-normalized expression of known HNF4α regulated genes identified in WT and Hnf4α<sup>Oc-cKO</sup> mice. Statistical tests were performed using unpaired student's t test and corrected by the False Discovery Rate. Corrected p<.05, n=4 per group.

Fig. S6

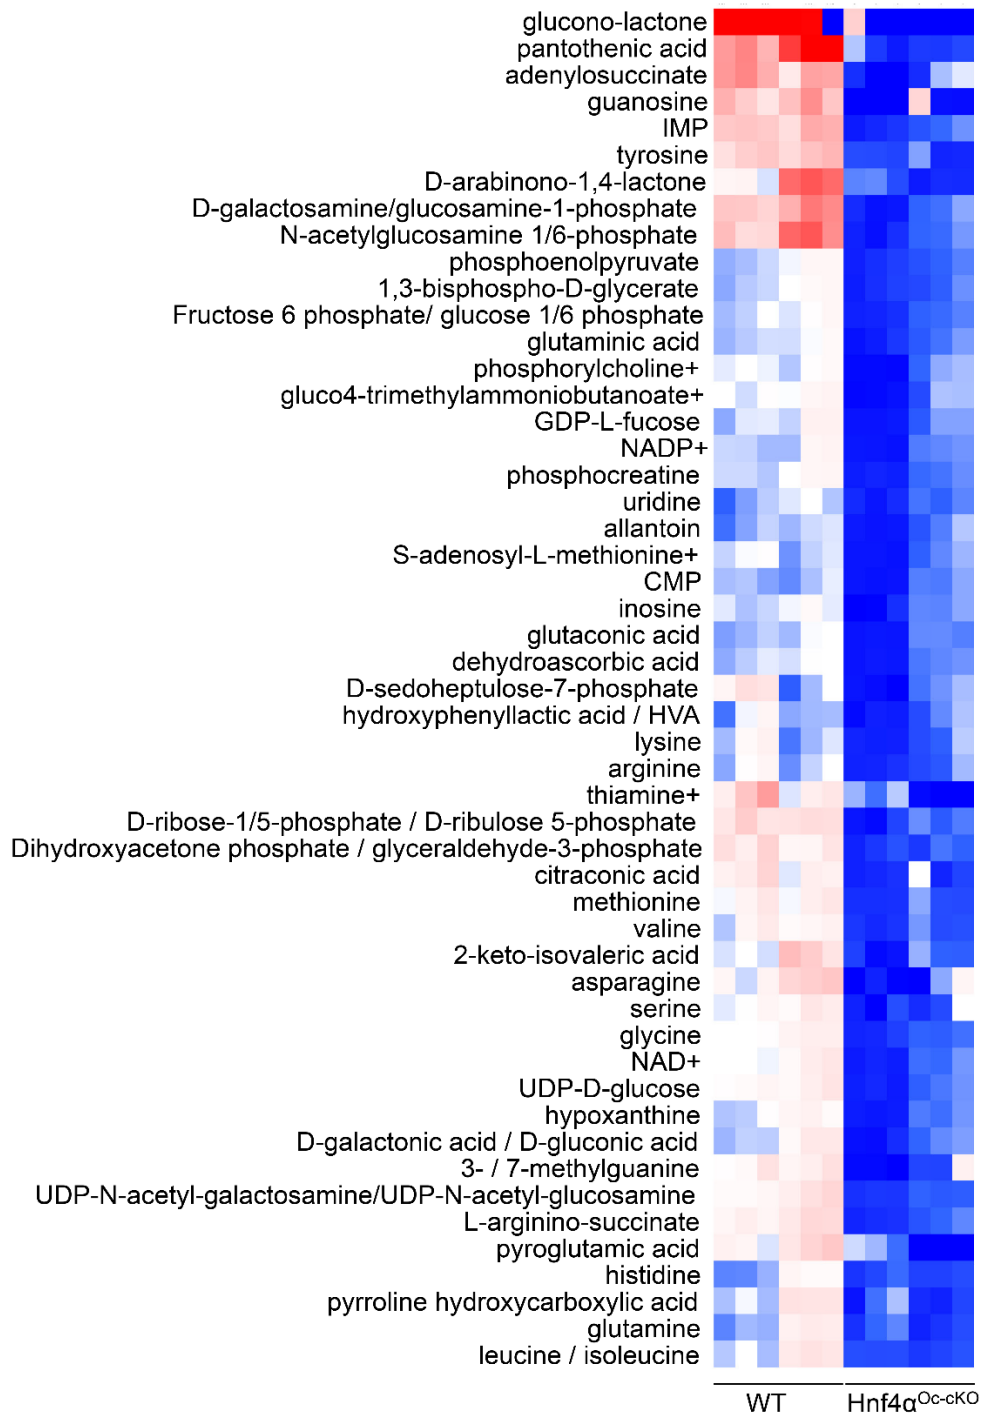

**Fig. S6: Osteoblast-specific deletion of *Hnf4 $\alpha$*  alters cell metabolism.** Heatmap-represented concentration of differentially regulated metabolites identified by metabolomics analysis of WT and *Hnf4 $\alpha^{Oc-cKO}$*  cultured primary osteoblasts. Statistical tests were performed using unpaired student's t test and corrected by the False Discovery Rate. Corrected  $p < .05$ ,  $n = 6$  per group.

Fig. S7

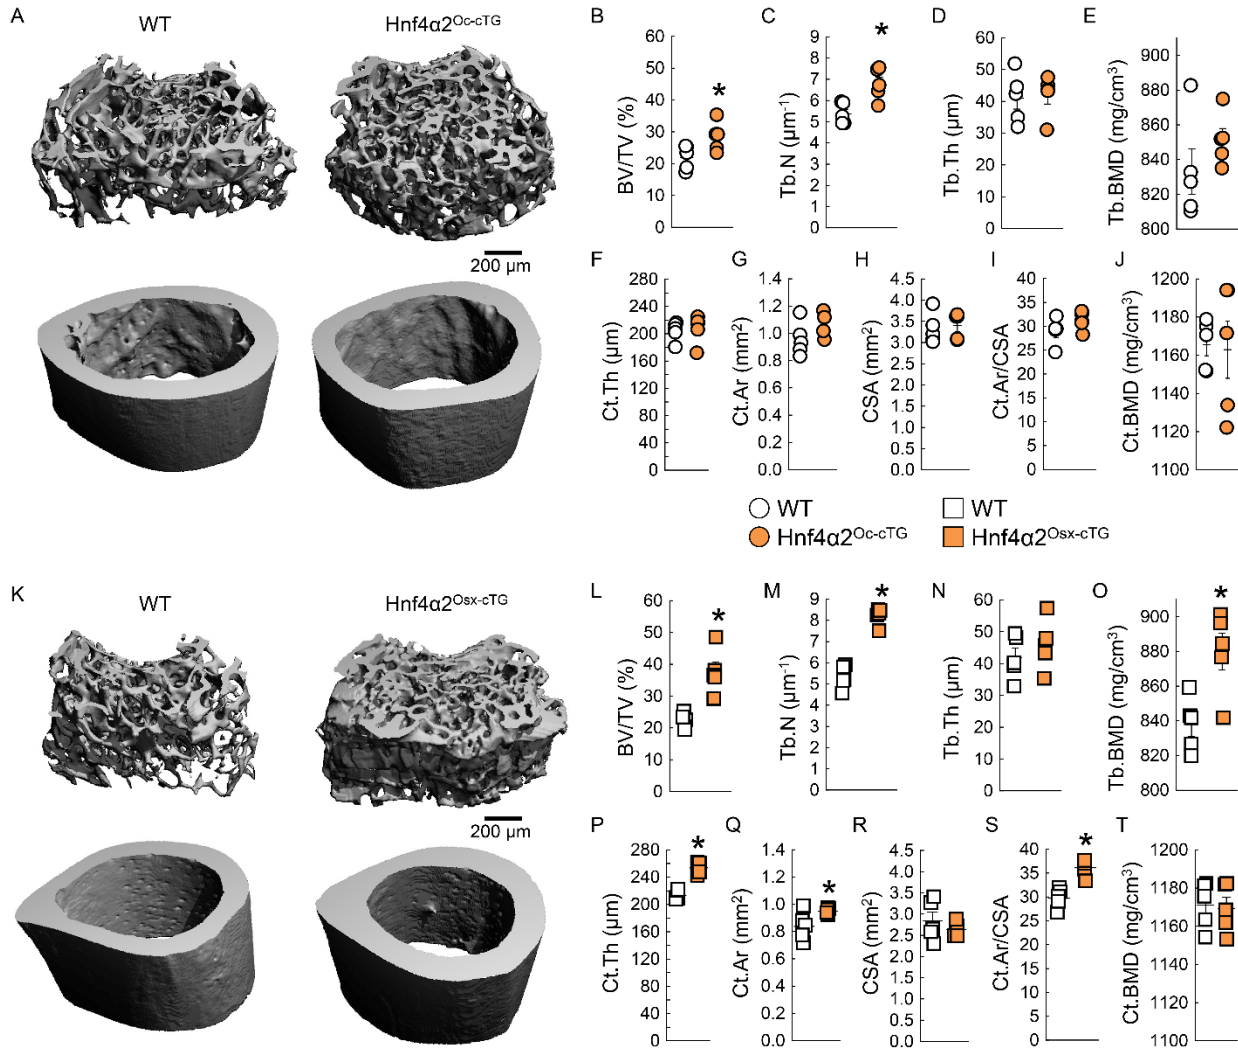

**Fig. S7: *Hnf4a2* expressed in early differentiated osteoblasts stimulates trabecular and cortical osteogenesis.** 3D microtomography analysis of femur metaphysis secondary spongiosa and midshaft cortical bone in 12 week-old (A-J) WT and Hnf4α<sup>Ox-cTG</sup> mice, and Hnf4α<sup>Ox-cTG</sup> and Hnf4α<sup>Ox-cTG</sup> male mice. (B-E, L-O) Quantitative analysis of trabecular bone parameters, and (F-J, P-T) quantitative analysis of cortical bone parameters. Values are expressed as mean±SE. n≥5 per group. p<0.05 vs. \*WT. Statistical tests were performed using unpaired student's t tests.



Fig. S8

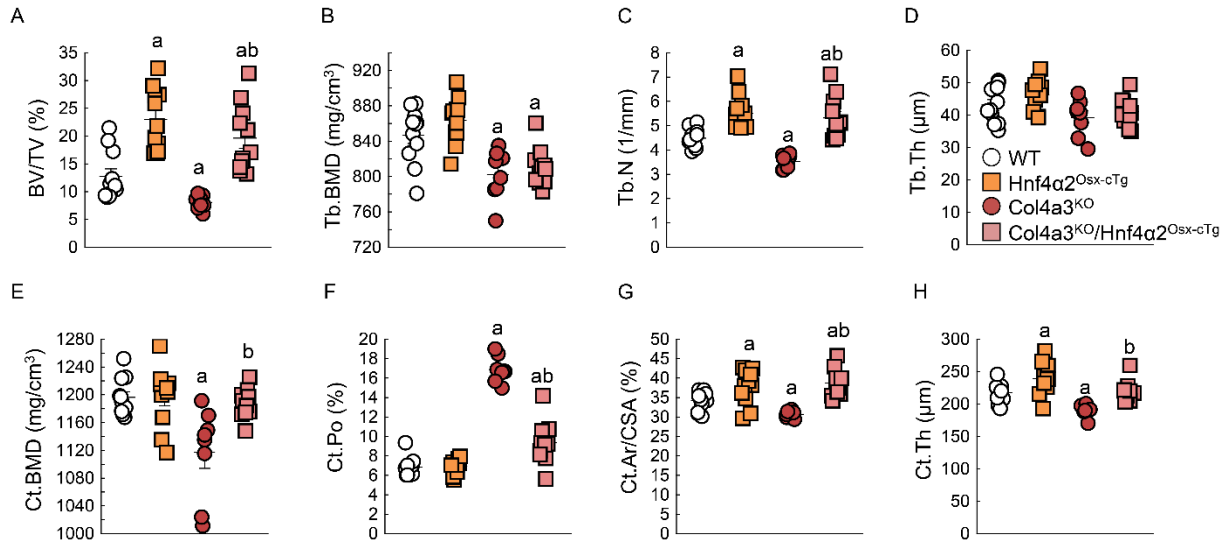

**Fig. S8: Genetic overexpression of *Hnf4α2* in osteoblasts prevents bone loss in female mice with CKD.** Microtomography analysis of (A-D) femur metaphysis secondary spongiosa, (E-H) femur cortical bone at metaphysis in 20 week-old WT, *Hnf4α<sup>Osx-cTG</sup>*, *Col4a3<sup>KO</sup>* and *Col4a3<sup>KO</sup>/Hnf4α<sup>Osx-cTG</sup>* female mice. Values are expressed as mean±SE. n≥6 per group. Corrected p<0.05 vs. <sup>a</sup>WT, <sup>b</sup>*Col4a3<sup>KO</sup>*. Statistical tests were performed using an ANOVA test followed by post-hoc t tests to test statistical differences and multiple testing correction using Holm-Bonferroni method.

## Supplementary tables

**Table S1.** Main Demographic and Clinical Characteristics of the Patients Included in the Analysis.

| Characteristic            | Group           |                 |                 | p value       |
|---------------------------|-----------------|-----------------|-----------------|---------------|
|                           | Healthy         | LR-ROD          | HR-ROD          |               |
| Patients, n(%)            | 9(31)           | 9(31)           | 11(38)          |               |
| Age (years), median (IQR) | 47(43.49)       | 39(35.47)       | 39(32.54)       | ns            |
| Gender, female, n(%)      | 4(44.4)         | 4(44.4)         | 2(18.2)         | ns            |
| Race, non-white, n (%)    | 2(7)            | 4(14)           | 2(7)            | ns            |
| Weight, kg (IQR)          | 84(75,90)       | 56(50,67)       | 63(56,77)       | 0.00144257414 |
| Height, meters (IQR)      | 1.70(1.65,1.75) | 1.55(1.55,1.69) | 1.67(1.50,1.74) | ns            |
| Clinical Protocol         |                 |                 |                 |               |
| Before PTX                | -               | 0               | 5               |               |
| Before KTx                | -               | 7               | 0               |               |
| OP Therapy                | -               | 2               | 6               |               |

PTX = parathyroidectomy; KTx = Kidney transplantation; OP = osteoporosis. Statistical tests were performed using an ANOVA test.

**Table S2.** Bone histomorphometry Analyses.

| Age                                                      | 6 weeks        |                                 |                |                                 | 12 weeks       |                                 |                |                                 |
|----------------------------------------------------------|----------------|---------------------------------|----------------|---------------------------------|----------------|---------------------------------|----------------|---------------------------------|
| Sex                                                      | Males          |                                 | Females        |                                 | Males          |                                 | Females        |                                 |
| Genotype                                                 | WT             | Hnf4 $\alpha$ <sup>Oc-cko</sup> | WT             | Hnf4 $\alpha$ <sup>Oc-cko</sup> | WT             | Hnf4 $\alpha$ <sup>Oc-cko</sup> | WT             | Hnf4 $\alpha$ <sup>Oc-cko</sup> |
| Parameter                                                |                |                                 |                |                                 |                |                                 |                |                                 |
| <i>O.Th</i> ( $\mu\text{m}$ )                            | 2.9 $\pm$ 0.2  | 2.7 $\pm$ 0.1                   | 3.4 $\pm$ 0.1  | 2.5 $\pm$ 0.2*                  | 2.6 $\pm$ 0.1  | 2.2 $\pm$ 0.1*                  | 2.6 $\pm$ 0.1  | 2.4 $\pm$ 0.1                   |
| <i>OS/BS</i> (%)                                         | 22.4 $\pm$ 2.1 | 7.2 $\pm$ 1.7*                  | 22.7 $\pm$ 2.9 | 13.5 $\pm$ 1.6*                 | 11.4 $\pm$ 4.1 | 3.9 $\pm$ 1.1                   | 11.8 $\pm$ 0.8 | 8.2 $\pm$ 0.9*                  |
| <i>MAR</i> ( $\mu\text{m}/\text{d}$ )                    | 3.1 $\pm$ 0.3  | 1.4 $\pm$ 0.4*                  | 2.6 $\pm$ 0.1  | 1.5 $\pm$ 0.2*                  | 1.3 $\pm$ 0.1  | 1.1 $\pm$ 0.2                   | 1.5 $\pm$ 0.1  | 1.1 $\pm$ 0.1*                  |
| <i>BFR/BS</i> ( $\mu\text{m}^3/\mu\text{m}^2/\text{d}$ ) | 1.5 $\pm$ 0.1  | 0.9 $\pm$ 0.2*                  | 1.4 $\pm$ 0.1  | 0.7 $\pm$ 0.1*                  | 0.5 $\pm$ 0.1  | 0.4 $\pm$ 0.2                   | 0.8 $\pm$ 0.1  | 0.6 $\pm$ 0.1*                  |
| <i>Oc.N/B.Pm</i> ( $\text{mm}^{-1}$ )                    | 12.0 $\pm$ 0.6 | 15.6 $\pm$ 1.8                  | 10.4 $\pm$ 0.6 | 8.5 $\pm$ 0.2                   | 5.8 $\pm$ 1.0  | 11.8 $\pm$ 1.7*                 | 6.9 $\pm$ 0.2  | 6.7 $\pm$ 0.8                   |
| <i>OcS/BS</i> (%)                                        | 14.7 $\pm$ 0.9 | 19.9 $\pm$ 1.2*                 | 20.5 $\pm$ 0.9 | 28.4 $\pm$ 3.4                  | 10.9 $\pm$ 0.7 | 15.1 $\pm$ 1.3*                 | 12.3 $\pm$ 1.1 | 14.6 $\pm$ 2.2                  |

O.Th = osteoid thickness; OS/BS = osteoid surfaces per bone surfaces; MAR = mineral apposition rate; BFR/BS=bone formation rate per bone surfaces; Oc.N/B.Pm.=number of osteoclasts per bone perimeter; Oc.S/BS=osteoclast surfaces per bone surfaces. Values are expressed as mean $\pm$ SE. n $\geq$ 4 per group. p<0.05 vs. \*sex and age-matched WT. Statistical tests were performed using unpaired student's t tests.

**Table S3:** Primers for RT-PCR analysis of murine transcripts.

| <b>Name</b><br><b>Product size (bp)</b> | <b>Forward 5--&gt;3</b> | <b>Reverse 5--&gt;3</b>  |
|-----------------------------------------|-------------------------|--------------------------|
| <i>Hnf4<math>\alpha</math>1/2</i> (95)  | TGATAACCACGCTACTTGCCTT  | AGCCTACTTCTGAATGTTTGGTGT |
| <i>Runx2</i> (192)                      | CGGACGAGGCAAGAGTTTCA    | GGATGAGGAATGCGCCCTAA     |
| <i>Sp7</i> (100)                        | TCTCAAGCACCAATGGACTCC   | CCAGGAAATGAGTGAGGGAAGG   |
| <i>Bglap</i> (146)                      | CCGCCTACAAACGCATCTATG   | GCTGCTGTGACATCCATACTTG   |
| <i>Dmp1</i> (86)                        | AGTGAGGAGGACAGCCTGAA    | GAGGCTCTCGTTGGACTCAC     |
| <i>Tnfrsf11b</i> (287)                  | TGTGCTGCGCACTCCTGGTG    | GGTGCGGTTGCACTCCTGCT     |
| <i>Tnfsf11</i> (223)                    | CTGGGACTGGGCCAGGTGGT    | GTTCTTCTGCACGGCCCCC      |
| <i>Rpl19</i> (239)                      | GCCCACAAGCTCTTTCCTTTCG  | GTGTTTTTCCGGCAACGAGC     |

**Table S4:** Sequences of *Hnf4 $\alpha$*  primers used to distinguish *Hnf4 $\alpha$*  isoforms.

| Isoforms              | Label                               | Forward                   | Reverse                  | Size | Region            |
|-----------------------|-------------------------------------|---------------------------|--------------------------|------|-------------------|
| Total                 | <i>Hnf4<math>\alpha</math></i>      | CTTAAGAAGTGCTTCGGGC       | CAGGCTGCTGCCTCGTAG       | 99   | Exon 3/4          |
| 1-3                   | <i>Hnf4<math>\alpha</math>1-3</i>   | GGAGTTTGAAAATGTGCAGGTGTTG | TGTGGTTCTTCTCACGCTC      | 200  | Exon<br>1A/2      |
| 5-6                   | <i>Hnf4<math>\alpha</math>5-6</i>   | GGAGTTTGAAAATGTGCAGGTGTTG | AACATGGTAATCGGGACAGCC    | 301  | Exon<br>1A/1C     |
| 7-9                   | <i>Hnf4<math>\alpha</math>7-9</i>   | GCCTTCAGGCCCTT            | TTGAGGTTGGCACCTCAGA      | 307  | Exon<br>1D/1E     |
| 7-12                  | <i>Hnf4<math>\alpha</math>10-12</i> | CTTGCTGCTGTGTGTGGG        | TTGAGGTTGGCACCTCAGA      | 282  | Exon<br>1E/2      |
| 1,2,4,5,7,8<br>,10,11 | <i>Hnf4<math>\alpha</math>1/2</i>   | TGATAACCACGCTACTTGCCTT    | AGCCTACTTCTGAATGTTTGGTGT | 95   | Exon 10           |
| 2,5,8,11              | <i>Hnf4<math>\alpha</math>2</i>     | GACAGATGTGTGAGTGGCCC      | AGGTTACTCCCAGGTGCTCT     | 248  | Insert<br>9/10    |
| 3,6,9,12              | <i>Hnf4<math>\alpha</math>3</i>     | TTGATCCAGATGCCAAGGGG      | CAGCACTACAGATCTCCAAG     | 289  | Exon8/<br>Insert8 |
